# Supplementary material for: Baseplate Component TssK and Spatio-Temporal Assembly of T6SS in Pseudomonas aeruginosa
Source: PubMed Central journal article supplement (PMC6657622; doi:10.3389/fmicb.2019.01615), 2019-07-18
Supplement: Data_Sheet_1.pdf [file Data_Sheet_1.pdf]

## Supplementary material

Liebl et al.

### Supplementary Tables

**Table S1.** List of bacterial strains and mutants

| <b>Bacterial strain</b>   | <b>Description</b>       | <b>Source or reference</b> |
|---------------------------|--------------------------|----------------------------|
| <i>P. aeruginosa</i> PAO1 | PAO1-UW                  | J. Mougous Lab             |
|                           | $\Delta pppA$ (PA0075)   | (51)                       |
|                           | $\Delta ppkA$ (PA0074)   | (51)                       |
|                           | $\Delta tagQ$ (PA0070)   | (51)                       |
|                           | $\Delta tagR$ (PA0071)   | (51)                       |
|                           | $\Delta tagS$ (PA0072)   | (51)                       |
|                           | $\Delta tagT$ (PA0073)   | (51)                       |
|                           | $\Delta tssM$ (PA0077)   | (51)                       |
|                           | $\Delta tssE$ (PA0087)   | this work                  |
| $\Delta tssK$ (PA0079)    | this work                |                            |
| <i>A. baumannii</i> 17978 | WT                       | (40)                       |
|                           | $\Delta tssM$            | (40)                       |
| <i>E. coli</i>            | DH5 $\alpha$ pRK2013     | Laboratory collection      |
| <i>E. coli</i>            | DH5 $\alpha$ pBluescript | Laboratory collection      |

**Table S2.** List of plasmids

| <b>Name</b>       | <b>Description and relevant features</b>                                                          | <b>Source or reference</b> |
|-------------------|---------------------------------------------------------------------------------------------------|----------------------------|
| pJN105            | <i>Replicative plasmid</i><br>( <i>araC</i> -p <i>BAD</i> cloned in pBBR1MCS-5; Gm <sup>R</sup> ) | (52)                       |
| pSW196            | mini-CTX1 based plasmid<br>( <i>araC</i> -p <i>BAD</i> from pBAD30; Tc <sup>R</sup> )             | (56)                       |
| pRK2013           | helper plasmid for conjugation<br>(oriColE1 RK2-Mob+ RK2-Tra+; Km <sup>R</sup> )                  | Addgene                    |
| pEXG2             | Cloning vector for allelic exchange, <i>sacB</i> , Gm <sup>R</sup>                                | (53)                       |
| pCR-Blunt-II-Topo | Plasmid for fusion gene subcloning and sequencing                                                 | Invitrogen                 |
| pJN105:TssK-sfGFP | C-Term. PA0079 translational fusion with sfGFP                                                    | This study                 |
| pJN105:TssB-GFP   | C-Term. PA0083 translational fusion with GFP                                                      | This study                 |
| pJN105:TssE-sfGFP | C-Term. PA0087 translational fusion with sfGFP                                                    | This study                 |
| pSW196:TssK-RFPT  | C-Term. PA0079 translational fusion with RFPT                                                     | This study                 |

**Table S3.** List of primers

| <b>Primers</b> | <b>Sequence</b>                   | <b>Description</b> |
|----------------|-----------------------------------|--------------------|
| TssK-F         | 5'CCGAATTCACCTTCGGAGTCCCTATGTCC'3 | PCR PA0079/TssK    |
| TssK-R         | 5'CCACTAGTTCCTCGAATGGCCAGAAAGGC'3 |                    |
| TssK.TGA-R     | 5' CGACTAGTTCATCCTCGAATGGCCC 3'   |                    |
| TssE-F         | 5'CCGAATTCGCCGACGGACGCCTGACATG'3  | PCR PA0087/TssE    |
| TssE-R         | 5'CCACTAGTTGTACGCCTCCGCTCGCCCT'3  |                    |
| TssE.TGA-R     | 5' CGACTAGTTCATGTACGCCTCCGCTC 3'  |                    |

## Supplementary Figures

FIGURE S1

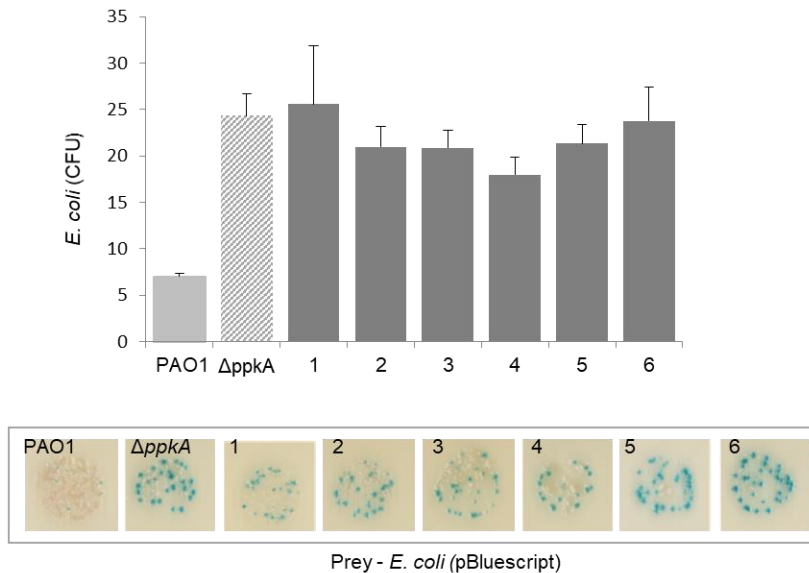

**Figure S1.** Functionality of T6SS analysed by competition assays between PAO1 strains expressing different fusion constructs and *E. coli* DH5 $\alpha$  containing pBlueScript. PAO1 (WT) expressing RFPT (from pSW196) and PAO1 $\Delta ppkA$  were used as positive and negative control, respectively. PAO1 expressing (1) *tssK-sfGFP*, (2) *tssE-sfGFP*, (3) *tssB-GFP*, (4) *tssB-GFP* and *tssK-RFPT*, (5) *tssE-sfGFP* and *tssB-RFPT* and (6) *tssE-sfGFP* and *tssK-RFPT* were tested against *E. coli* as a prey. All fusions are described in Material & Methods. Expression of fusions were induces with 0.025% arabinose. Competition assays show that all fusions inhibit T6SS-mediated killing compared to the PAO1 WT. Upper panel: counts of *E. coli* colony forming units (CFU) in three independent competing reaction. Lower panel: representative images of  $10^{-5}$  dilution spotted on LB, X-gal/IPTG plates.

FIGURE S2

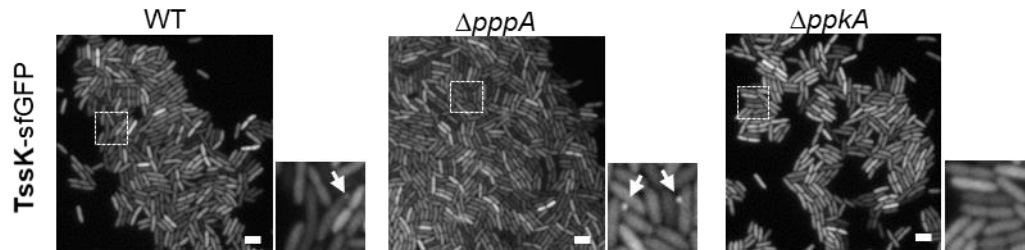

**Figure S2.** Fluorescence microscopy images of *P. aeruginosa* wild-type,  $\Delta pppA$  and  $\Delta ppkA$  mutants expressing TssK-sfGFP. Note that no discernible TssK-sfGFP assemblies were found in  $\Delta ppkA$  mutant cells. Representative fluorescence images are shown. TssK-spots are highlighted by arrows. Bars = 0.5  $\mu\text{m}$

FIGURE S3

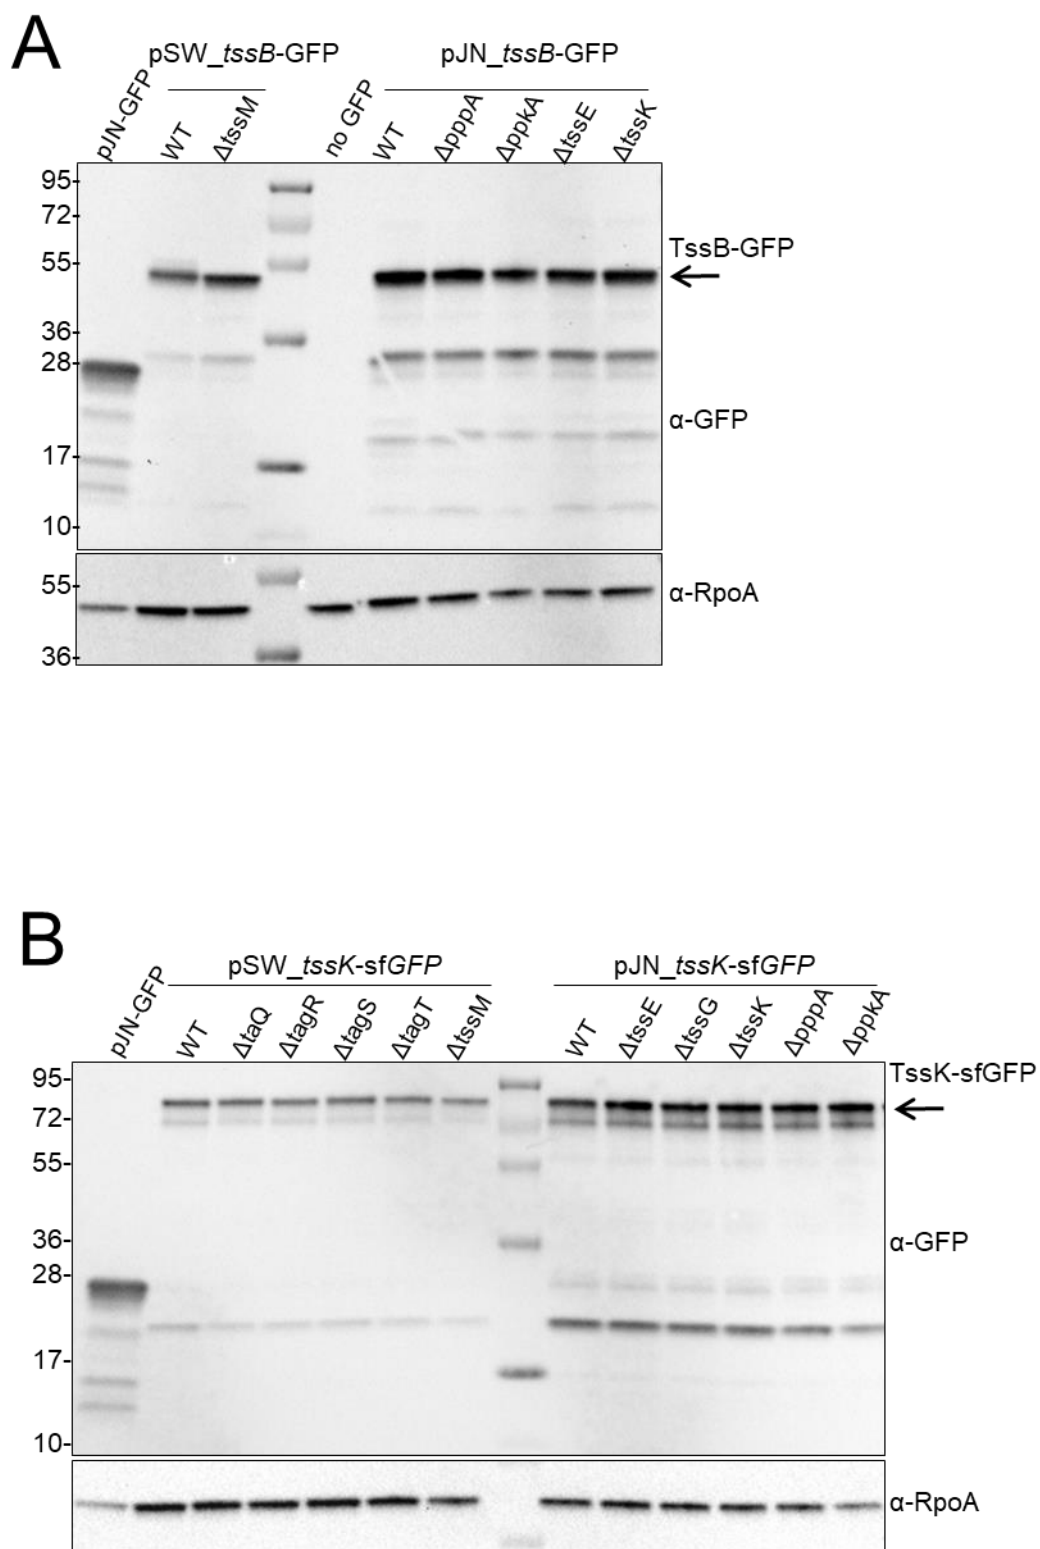

**Figure S3.** Expression levels of different protein fusions with sfGFP in wild-type strain and different mutants. Strains expressing *tssB*-sfGFP (A) or *tssK*-sfGFP (B) from either integrative

pSW196 or replicative pJN105 plasmid were analyzed by immunoblotting using GFP polyclonal antibodies. RpoA was used as loading control.

FIGURE S4

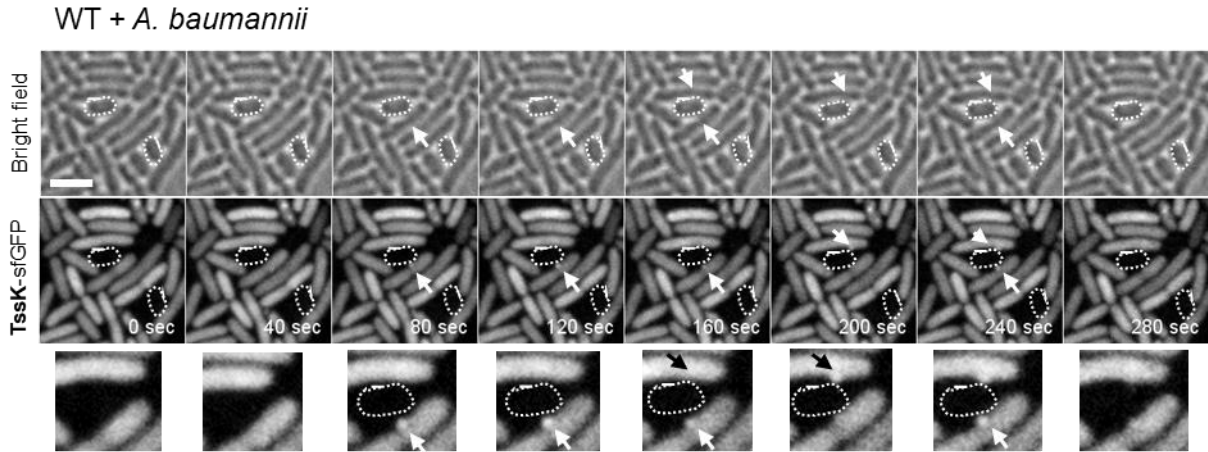

**Figure S4.** Time-lapse series of *P. aeruginosa* expressing TssK-sfGFP in mixed culture with *A. baumannii* (border by dashed lines). Note that perimembrane TssK spots are oriented specifically towards the contact with competing bacteria (arrows). Selected bright field (upper panel) and fluorescence (lower panel) images from a time-lapse are shown. Bars = 0.5  $\mu$ m

FIGURE S5

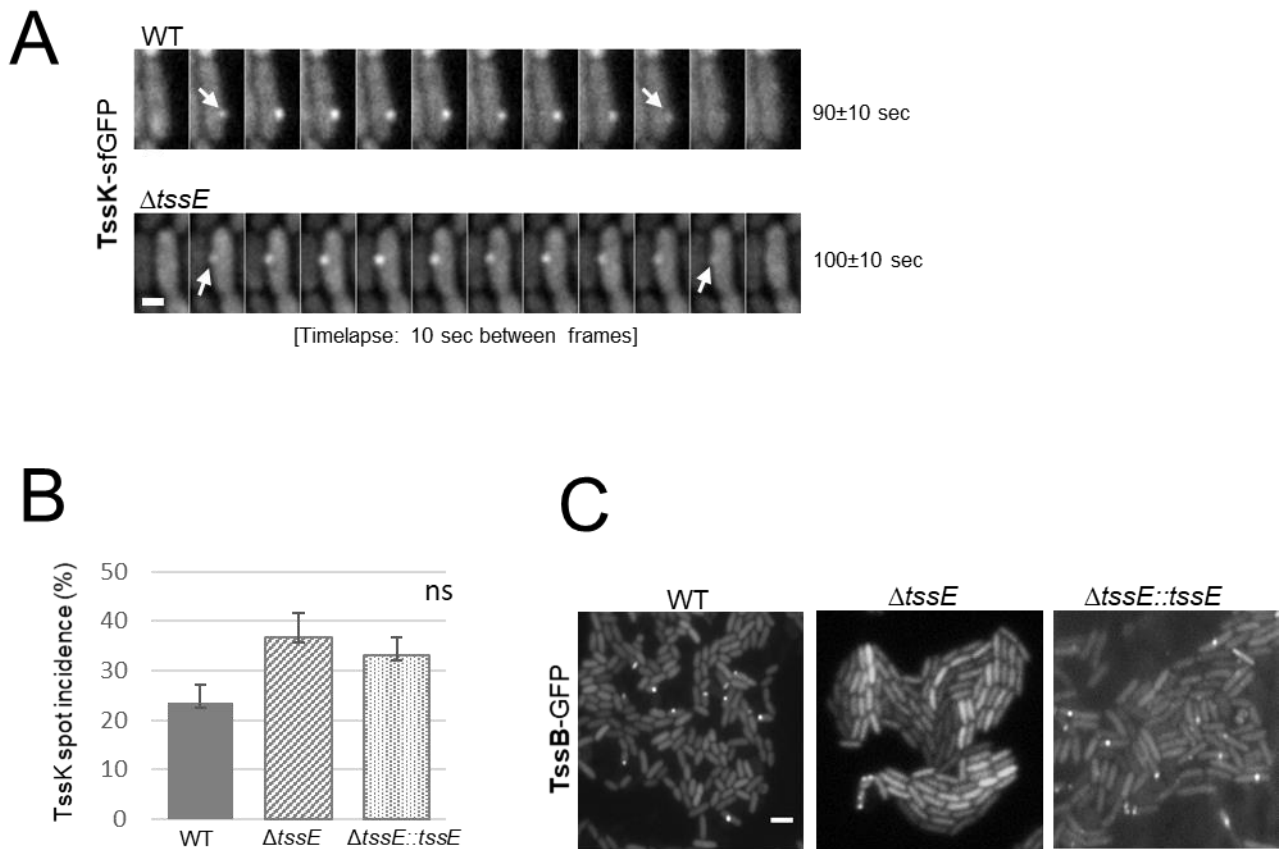

**Figure S5.** (A) Dynamics of TssK-baseplate assembly-disassembly is not significantly affected in  $\Delta tssE$  mutant in comparison to the wild-type *P. aeruginosa* PAO1. Time-lapse series demonstrate transient, perimembrane assembly and disassembly of TssK-baseplate structure (indicated by arrows) within a period of 90-100 sec. Bars = 0.5  $\mu$ m. (B) TssK spot incidence in the wild-type PAO1 strain, in  $\Delta tssE$  and in complemented strain  $\Delta tssE/tssE$  expressing the same construct was not significantly different. (C) Assembly of TssB-GFP structures in wild type (WT),  $\Delta tssE$  and  $\Delta tssE::tssE$ . Note readily detectable TssB structures in WT and  $\Delta tssE::tssE$ .

## Supplementary Material and Methods

### Competition assays

The competition assays were performed as previously described (Hachani *et al.*, 2013). *P. aeruginosa* and *E. coli* (pBluescript) were grown overnight in 3 ml LB medium supplemented with appropriate antibiotics. Diluted overnight cultures were inoculated in the same medium containing 0.025% arabinose (to induce the expression of specific fusion) and the culture was grown until OD<sub>600</sub>=1. Then 1 ml of each culture were spin down and pellet was resuspended in 100 µl LB with arabinose 0.025%. Indicated *P. aeruginosa* strains (predator) were mixed with *E. coli* (prey) in ratio 1:2 (predator:prey). Competition reactions (20 µl), realized in triplicate, were spotted onto LB agar plates containing 50 µg/ml ampicillin and incubated 5 hours at 37°C. The totality of bacteria was recover in LB and dilutions were plated in triplicates onto LB plates containing Xgal (40 µg/ml) and IPTG (100 µM) to visualize *E. coli* (blue colonies).

### Western blotting

The expression levels of protein fusions in different mutants were assessed by immunoblotting. For the Western blot, total bacterial samples (OD<sub>600</sub>=1) were separated on Criterion 4-20% TGX precasted gels, BioRad and transferred onto a PVDF membrane (GE.Healthcare) by electrotransfert in 20 % Laemmli buffer. After blocking step in 5 % milk, polyclonal anti-GFP antibodies (diluted 1/5000<sup>e</sup> in PBS buffer with 0.1 % Tween20) were incubated one hour at room temperature, followed with a second antibodies incubation (anti-rabbit HRP, dilution 1/20 000, Sigma). Detection was performed using Luminata Classico HRP-substrate (Millipore) using BioRad ChemiDoc apparatus.

### Supplementary reference

1. Hachani A, Lossi NS, & Filloux A (2013) A visual assay to monitor T6SS-mediated bacterial competition. *Journal of visualized experiments : JoVE* 10.3791/50103(73):e50103.
